# Supplementary material for: Glutathione transferase photoaffinity labeling demonstrates GST activation by safeners and NPR1-independent activation by BTH
Source: bioRxiv or medRxiv preprint supplement (doi:10.1101/2023.01.19.524829), 2023-01-23
Supplement: Supplementary file [file media-1.pdf]

## Supplemental Tables

### Table S1 Used plasmids

| Plasmid   | Description                                                                                              | Reference             |
|-----------|----------------------------------------------------------------------------------------------------------|-----------------------|
| pJK268c   | pL1V2-P19-F2, Binary vector.                                                                             | Kourelis et al., 2020 |
| pICH41414 | pL0M-T-35S-1-41414, Level 0 Module, 35S terminator, Golden Gate plant kit                                | Engler et al., 2014   |
| pICH51288 | pL0M-PU-35S-TMV-3-51288, Level 0 Module, 2 x 35S promoter + TMV $\Omega$ (0.8 kb), Golden Gate plant kit | Engler et al., 2014   |
| EC15456   | pL0V-SC1-15456, Level 0 Cloning vector, Golden Gate original vector                                      |                       |
| EC15259   | pL0M-C2-6xHis-15259, Level 0 Module, His for C-terminal fusion                                           |                       |
| EC15095   | pL0M-C2-eGFP-15095, Level 0 Module, eGFP for C-terminal fusion                                           |                       |
| pMF358    | pL2M-P19-kan-2x35S::AtGSTF2-HIS                                                                          | This work             |
| pMF359    | pL2M-P19-kan-2x35S::AtGSTF2-GFP                                                                          | This work             |
| pMF360    | pL2M-P19-kan-2x35S::AtGSTU4-HIS                                                                          | This work             |
| pMF361    | pL2M-P19-kan-2x35S::AtGSTU4-GFP                                                                          | This work             |
| pMF364    | pL2M-P19-kan-2x35S::AtGSTU10-HIS                                                                         | This work             |
| pMF365    | pL2M-P19-kan-2x35S::AtGSTU10-GFP                                                                         | This work             |
| pMF366    | pL2M-P19-kan-2x35S::AtGSTF6-HIS                                                                          | This work             |
| pMF367    | pL2M-P19-kan-2x35S::AtGSTF6-GFP                                                                          | This work             |
| pMF368    | pL2M-P19-kan-2x35S::AtGSTF7-HIS                                                                          | This work             |
| pMF369    | pL2M-P19-kan-2x35S::AtGSTF7-GFP                                                                          | This work             |
| pJK668    | pL2M-kan-2x35S::FLS3                                                                                     | Buscaill et al., 2021 |

### Table S2 Used oligonucleotides

| Name       | Sequence (5' to 3')*                     |
|------------|------------------------------------------|
| GSTU10f    | <b>TTGAAGACAAAATGGAGGAGAAGAAGAGCAAAG</b> |
| GSTU10r    | <b>TTGAAGACAACACCTGCATTTGCAGCCTGC</b>    |
| GSTF2f     | <u>TTGGTCTCAAATGGCAGGTATCAAAGT</u>       |
| GSTF2r     | <u>TTGGTCTCAGTCACCATCTCAAAGGC</u>        |
| GSTF2f     | <u>TTGGTCTCATGACCTCAAGCTCTTCGAATC</u>    |
| RV2_GSTF2r | <u>TTGGTCTCACACCCTGAACCTTCTCGGAAG</u>    |
| FW_GSTF6f  | <u>TTGGTCTCAAATGGCAGGAATCAAAG</u>        |
| RV_GSTF6r  | <u>TTGGTCTCACACCAAGAACCTTCTGAGCAG</u>    |
| FW_GSTF7f  | <u>TTGGTCTCAAATGGCAGGAATCAAAG</u>        |
| RV_GSTF7r  | <u>TTGGTCTCACACCAAGAACCTTCTTAGCAG</u>    |
| FW_GSTU8   | <u>TTGGTCTCAAATGAACCAAGAAGAGCACG</u>     |
| RV_GSTU8r  | <u>TTGGTCTCACACCATTAGATGTAACACTTC</u>    |

\*, Highlighted are the BsaI restriction sites (underlined) and the BpiI restriction sites (bold).
